# Supplementary material
Source: publisher figshare collection journal article supplement (https://gsapubs.figshare.com/ndownloader/files/22397964)
Supplement: Supplementary file 1 [file 22397964]

**SUPPLEMENTARY DATA FILE 6.**

**PREVIOUS RESEARCH ON WRANGELLIA**

This brief overview of previous research highlights some of the key references, grouped into three main areas (south-central Alaska, southwest Yukon and southeast Alaska, and British Columbia). Supplementary data files 1 and 2 (an Endnote library and .txt file, respectively) include over 500 references involving research related to Wrangellia.

Early stratigraphic and paleomagnetic studies of Wrangellia significantly influenced the geological research community. One of the earliest modern works on Wrangellia, by Jones *et al.* (1977), had a major influence in the usage of terranes to assist with tectonic reconstructions. Wrangellia was one of the first sets of allochthonous crustal fragments to be referred to as a terrane, and this was based on the distinct stratigraphy and paleomagnetism of Wrangellia flood basalts (Winkler, 2000). Paleomagnetic studies on the flood basalts in Alaska indicated long-distance displacement from the latitude where they erupted at low latitude (Hillhouse, 1977). The landmark works of Jones *et al.* (1977) and Hillhouse (1977) laid part of the foundation for future research on Wrangellia and spawned paleogeographic reconstructions of other areas of western North America.

**Previous research on Wrangellia in south-central Alaska**

There is a remarkable history of exploration and early geological work in southern Alaska. The earliest recorded geological work was conducted by pioneers exploring the expanse of unknown territory in Alaska in the late 1800’s and early 1900’s (Hunt, 1996). People native to the Wrangell Mountains area used copper implements, which were derived from copper deposits near the contact between the top of the Nikolai flood basalts and the overlying Chitistone Limestone (Winkler, 2000) The search for these copper deposits spurred exploration of the Wrangell Mountains and eventually lead to mining of what were some of the highest-grade copper deposits in the world (Kennicott mill-site) (MacKeve*tt et a*l., 1997). The Wrangell and St. Elias Mountains are now part of a National Park and World Heritage Site, which is the largest internationally protected area in the world (Hunt, 1996). Exceptional historical accounts from the Wrangell-St. Elias area are given in books by Winkler (2000), Hunt (1996), and Sherwood (1965).

Modern geologic overviews of southern Alaska are presented by many authors [Plafker *et al.* (1989b), Nokleberg *et al.* (1994), Plafker *et al.* (1994), Winkler (2000), and Trop and Ridgeway (2007)]. The geology of the Wrangell Mountains has been exceptionally well-mapped and described by E. M. MacKevett, Jr. (1978) and D. Richter (1976). The 1:250,000 scale mapping has been compiled in digital format by *et al.* (2005). Major contributions describing the formations in the Wrangell Mountains include Armstrong *et al.* (1969), Armstrong and MacKevett (1977, 1982), Smith and MacKevett (1970), MacKevett (1970; 1971) and Trop *et al.* (2002). The paleomagnetic character of Wrangellia in Alaska is addressed by Hillhouse (1977), Hillhouse and Gromme (1984), Hillhouse and Coe (1994).

On the southern flank of the east-central Alaska Range, geologic exploration and early mapping was carried out by Mendenhall (1900), Moffit (1912; 1954), Rose (1965, 1966a, b), Rose and Saunders (1965), Stout (1965; 1976), and Richter and Jones (1973). More recent mapping and a geologic overview of the Amphitheater Mountains and Mount Hayes quadrangle was undertaken by Nokleberg *et al.* (1982; 1985; 1992). A digital version of this mapping is included in the work compiled by Wilson *et al.* (1998). A nice summary of sedimentary sequences at the base of the Nikolai in the Amphitheater Mountains is given by Blodgett (2002). In the Clearwater Mountains, in the southeast corner of the Healy quadrangle, mapping was accomplished by Smith (1973), Silberling *et al.* (1981), and Csejtey *et al.* (1992). The geology of the Clearwater Mountains is summarized by Smith (1971; 1973) and Turner and Smith (1974). To the southwest, in the northern Talkeetna Mountains, recent mapping has revealed exposures of Nikolai basalts and sills (Werd*on et a*l., 2000a, b, 2002; Schmi*dt et a*l., 2003a; Schmi*dt et a*l., 2003b).

The geophysical properties of Wrangellia in southern Alaska are described by Glen *et al.* (2007a; 2007b) and Saltus *et al.* (2007). The character and development of sedimentary basins in the east-central Alaska Range are described by Ridgway *et al.* (2002). An overview of metallogenic prospects related to the Nikolai Formation in southern Alaska is presented by Schmidt and Rogers (2007).

**Previous research on Wrangellia in southwest Yukon and southeast Alaska**

The earliest geological mapping of the Kluane Ranges was by McConnell (1905), Cairnes (1915), Sharp (1943), Bostock (1952), and Kindle (1953). More recent regional mapping in southwest Yukon was accomplished by Muller (1967), Read and Monger (1976), and Dodds and Campbell (1992a, b, c). Muller (1967) first proposed the correlation between the flood basalts in Yukon and those underlying extensive areas of southern Alaska. Nickel and copper mineralization discovered in the Kluane Ranges in the early 1950’s has led to continuous exploration into the mineralization potential of the mafic and ultramafic intrusions related to the Nikolai basalts (Carne, 2003). Campbell (1981) and Miller (1991) completed thesis projects on mineral deposits related to Nikolai basalts near Quill Creek. The Yukon Geological Survey (YGS) recently initiated a bedrock mapping project in the Kluane Ranges (1:50,000 scale) led by Israel *et al.* (2004; 2005; 2006).

Mapping and field studies in southeast Alaska spurred several reports on Triassic basalt sequences in different areas of southeast Alaska. Plafker *et al.* (1976) first recognized Nikolai equivalents in southeast Alaska, and pursued this work with detailed studies of metabasalts on the Chilkat Peninsula area near Haines, Alaska (Plafker & Hudson, 1980; Davis & Plafker, 1985; Plafk*er et a*l., 1989a). Other studies that describe the lithologic character and geochemistry of isolated segments of Triassic basalts in southeast Alaska include those by Loney et el. (1975), Decker (1981), Ford and Brew (1987, 1992), and Gehrels and Barker (1992). Regional mapping (1:600,000 scale) and an overview of the geology of southeast Alaska are presented by Gehrels and Berg (1992, 1994).

**Previous research on Wrangellia in British Columbia**

The earliest exploratory geological work in the Queen Charlotte Islands (Haida Gwaii) was made by Dawson (1880). The foundation for the modern geologic framework for the islands was accomplished in an exceptionally-detailed study by Sutherland-Brown (1968). These studies have been expanded upon with works on Mesozoic and younger strata by Cameron (1988), Lewis (1991), Thompson (1988; 1991), and Woodsworth (1991).

The earliest geologic studies on northern Vancouver Island were made by Selwyn (1872), Dawson (1887), Dolmage (1919), Gunning (1930; 1931; 1932), and Hoadley (1953). On central and southern Vancouver Island, early fieldwork was carried out by Clapp (1909, 1913), Clapp and Cooke (1917), Stevenson (1945), Jeletzky (1950), and Fyles (1955). Early regional mapping and stratigraphic studies on Vancouver Island were accomplished by Muller and co-workers (Muller & Carson, 1969; Muller & Rahmani, 1970; Mull*er et a*l., 1974; Muller, 1977, 1980, 1981; Mull*er et a*l., 1981) and Jeletzky (1970, 1976). Carlisle supervised four Ph.D. theses related to the Karmutsen Formation (Surdam, 1967; Asihene, 1970; Kuniyoshi, 1972; Lincoln, 1978) that spawned a number of papers on the low-grade metamorphism of the Karmutsen (Surdam, 1968a, b, 1969, 1970; Kuniyoshi & Liou, 1976; Lincoln, 1981; Lincoln, 1986). These studies were impressive in their thoroughness. Carlisle thoroughly documented the stratigraphic relationships and character of the Karmtusen Formation (Carlisle, 1963; Carlisle, 1972; Carlisle & Suzuki, 1974). Low-grade metamorphism of the Karmutsen Formation has also been studied by Cho *et al.* (Cho & Liou, 1987; C*ho et a*l., 1987), Starkey and Frost (1990), Teraybayashi (1993), and Greenwood *et al.* (1991).

Wrangellia sequences have recently been described during regional mapping studies (1:50,000 scale) on northern Vancouver Island by Nixon and co-workers (1993b, a; 1994a, b; 1995a, b; 2006a; 2006b; 2006d; 2006c; 2006e; 2007; 2008) and on southern Vancouver Island by Massey and co-workers (Massey & Friday, 1987, 1988, 1989; Massey, 1995a, b, c). Paleozoic basement of Wrangellia is well-described in the works by Massey, as well as in studies by Juras (1987), Yole (1963, 1965, 1969), Sutherland-Brown and Yorath (1985), Brandon *et al.* (1986), Yorath *et al.* (1999) and Katvala and Henderson (2002). Irving and Yole (1972), Yole and Irving (1980), and Irving and Wynne (1990) studied the paleomagnetism of the Karmutsen basalts. A digital geologic map for British Columbia has been compiled by Massey *et al.* (2005a, b). The most recent geochemical and isotopic studies of Karmutsen basalts were undertaken by Barker *et al.* (1989), Andrew and Godwin (1989), Lassiter *et al.* (1995), and Yorath *et al.* (1999).

**REFERENCES**
